# Supplementary material
Source: PubMed Central journal article supplement (PMC4001917)
Supplement: NIHMS563519-supplement-Table_S1.pdf [file NIHMS563519-supplement-Table_S1.pdf]

**Table S1. Enzymes and Substrates Used for the Assay of 5 Cyclin-CDK Complexes, Related to the Experimental Procedures**

|   | Kinase        |     | Kinase conc.  | Kinase conc. | ATP conc. | Substrate    |     |                    |        |
|---|---------------|-----|---------------|--------------|-----------|--------------|-----|--------------------|--------|
|   | Name          | Lot | ng/50 $\mu$ l | nM*          | $\mu$ M   | Name         | Lot | $\mu$ g/50 $\mu$ l | nM     |
| 1 | CDK1/CyclinB1 | 025 | 12.5-50       | 1.75-7       | 1         | RBER-CHKtide | 029 | 0.07-0.35          | 29-220 |
| 2 | CDK2/CyclinA2 | 005 | 12.5-50       | 1.8-7.2      | 0.3       | RBER-CHKtide | 029 | 0.07-0.35          | 29-220 |
| 3 | CDK2/CyclinE1 | 009 | 5-20          | 0.75-3       | 1         | RBER-CHKtide | 029 | 0.07-0.35          | 29-220 |
| 4 | CDK4/CyclinD1 | 007 | 10-40         | 1.7-6.8      | 3         | RBER-CHKtide | 029 | 0.07-0.35          | 29-220 |
| 5 | CDK6/CyclinD1 | 004 | 100-400       | 16-64        | 3         | RBER-CHKtide | 029 | 0.07-0.35          | 29-220 |

\*Maximal molar enzyme assay concentrations, implying enzyme preparations exclusively containing 100% active enzyme.
